# Supplementary material
Source: PubMed Central journal article supplement (PMC4369402)
Supplement: NIHMS661935-supplement-1.pdf [file NIHMS661935-supplement-1.pdf]

## Supplemental Data

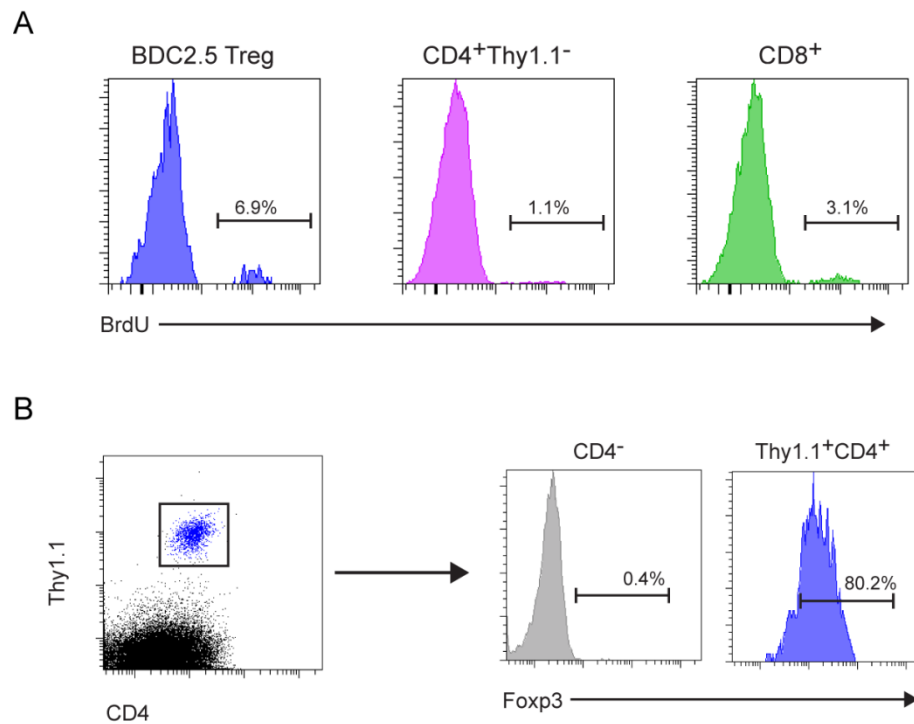

**Supplemental Figure 1.** (A) BDC2.5 Tregs proliferate in the islets. 2 weeks post-Treg transfer, a NOD.CD28<sup>-/-</sup> mouse was i.p. injected with 2.5 mg BrdU 4 hours prior to sacrifice. Islet cell populations were distinguished as in **Fig. 1B** and assessed for BrdU incorporation by flow cytometry. (B) BDC2.5 Tregs maintain high levels of Foxp3 in the islets. 2 weeks post-transfer, CD4<sup>+</sup>Thy1.1<sup>+</sup> BDC2.5 Tregs in the islets of a NOD.CD28<sup>-/-</sup> mouse were analyzed for Foxp3 expression. Foxp3<sup>+</sup> gate was set using CD4<sup>-</sup> islet cells as the negative peak.

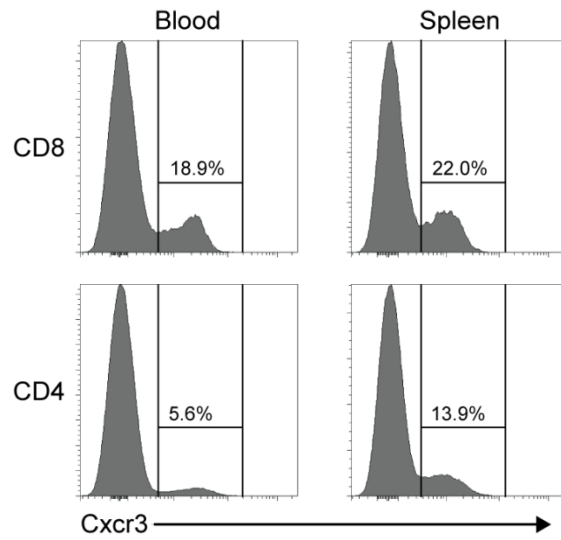

**Supplemental Figure 2.** Peripheral CD8<sup>+</sup> T cells in NOD mice express Cxcr3. Blood cells and splenocytes from 16 week-old female NOD mice were analyzed by flow cytometry. CD4<sup>+</sup> and CD8<sup>+</sup> T cells were pre-gated as CD45<sup>+</sup>DAPI<sup>-</sup>B220<sup>-</sup>CD11c<sup>-</sup>.

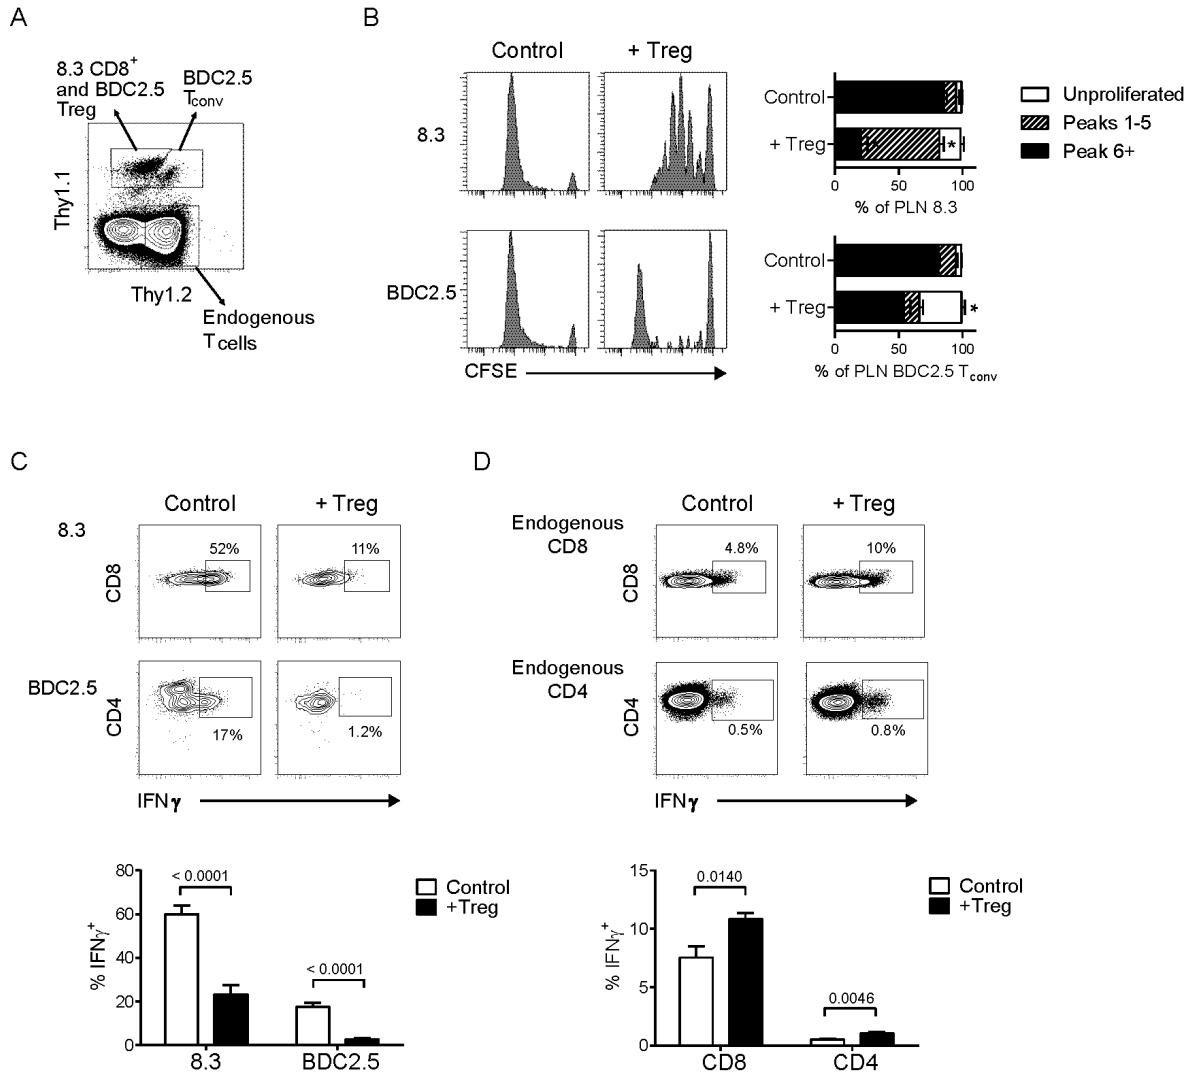

**Supplemental Figure 3.** BDC2.5 Tregs suppress proliferation and priming of new effector T cells in the draining PLN. (A-D)  $10^6$  CFSE-labeled 8.3.Thy1.1<sup>+</sup> CD8<sup>+</sup> T cells and BDC2.5.Thy1.1<sup>+</sup>Thy1.2<sup>+</sup> CD4<sup>+</sup>CD25<sup>-</sup> T cells were transferred to NOD.CD28<sup>-/-</sup> mice 3 d following BDC2.5.Thy1.1<sup>+</sup> Treg treatment or to untreated littermates and analyzed 4 d later. (A) Representative flow plot depicting gating of endogenous and transferred T cells. Cells were pre-gated as CD45<sup>+</sup> lymphocytes. Transferred 8.3 CD8<sup>+</sup> T cells and BDC2.5 Tregs were gated as Thy1.1<sup>+</sup>Thy1.2<sup>-</sup> and were further differentiated based on CD8 and CD4 expression. BDC2.5 conventional CD4<sup>+</sup> T cells were Thy1.1<sup>+</sup>Thy1.2<sup>+</sup>. Endogenous T cells were Thy1.2<sup>+</sup>Thy1.1<sup>-</sup>.

**(B)** Representative histograms pre-gated on Thy1.1<sup>+</sup> CD8<sup>+</sup> 8.3 T cells and Thy1.1<sup>+</sup>Thy1.2<sup>+</sup>CD4<sup>+</sup> BDC2.5 T cells depicting CFSE dilution of transferred cells in the PLN with and without Treg treatment. Bar graphs depict the percentage of cells that did not divide (Unproliferated), underwent 1-5 rounds of division (Peaks 1-5), or underwent 6 or more rounds of division (Peak 6+). Kruskal-Wallis test followed by Dunn's post test, \*, P < 0.05. **(C and D)** PLN cells were restimulated *in vitro* with PMA and ionomycin in the presence of Brefeldin A for 2-3 hours prior to intracellular staining for IFN $\gamma$ . **(C)** Representative flow plots pre-gated on 8.3 CD8<sup>+</sup> (top) and BDC2.5 T<sub>conv</sub> (bottom) cells showing IFN $\gamma$  expression by intracellular flow cytometry. Bar graph depicts summary data from 6 mice per group from 2 independent experiments. **(D)** Representative flow plots pre-gated on endogenous islet Thy1.2<sup>+</sup>Thy1.1<sup>-</sup> CD8<sup>+</sup> (top) and CD4<sup>+</sup> (bottom) T cells and quantification of the percent expressing intracellular IFN $\gamma$ <sup>+</sup>. Bar graph depicts summary data as in C. Bar graphs depict mean  $\pm$  SEM. P values for C and D were determined by Mann-Whitney test.

**Supplemental Table 1. Fold-regulation in Treg-treated versus age-matched controls**

| Gene   | Day 3 post-Treg | Day 7 post-Treg | Gene     | Day 3 post-Treg | Day 7 post-Treg |
|--------|-----------------|-----------------|----------|-----------------|-----------------|
| Actb   | -1.2            | -1.1            | Cxcr5    | -1.5            | -1.3            |
| Ccl1   | -1.1            | -1.5            | Cxcr6    | -2.1            | -2.9            |
| Ccl11  | 1.2             | 1.2             | Foxp3    | 1.1             | -1.5            |
| Ccl12  | -1.4            | -1.7            | Gapdh    | 1.1             | -1.0            |
| Ccl19  | -1.4            | -2.3            | Gzma     | <b>-4.7</b>     | <b>-7.8</b>     |
| Ccl2   | -1.2            | 1.5             | Gzmb     | <b>-6.1</b>     | <b>-8.5</b>     |
| Ccl20  | -1.3            | -1.2            | Hprt1    | 1.0             | 1.1             |
| Ccl25  | -1.5            | 1.2             | Hsp90ab1 | 1.1             | 1.0             |
| Ccl3   | -1.4            | 1.5             | Icam1    | -1.4            | 1.1             |
| Ccl4   | -1.1            | 1.7             | Icos     | -1.5            | -1.9            |
| Ccl5   | -2.0            | -2.1            | Ifng     | -2.0            | <b>-3.5</b>     |
| Ccl7   | -1.1            | 1.6             | Igsf6    | -1.5            | -1.7            |
| Ccl8   | -2.1            | <b>-4.3</b>     | Il10     | -1.0            | <i>3.1</i>      |
| Ccl9   | -1.9            | -1.6            | Il12b    | -1.2            | 1.5             |
| Ccr1   | -1.7            | -1.5            | Il15     | -1.4            | -1.0            |
| Ccr10  | -1.1            | 1.1             | Il16     | -1.8            | -2.7            |
| Ccr2   | -1.5            | -1.9            | Il-17F   | -1.2            | 1.8             |
| Ccr3   | -2.0            | -1.8            | Il1a     | -1.1            | 2.1             |
| Ccr4   | -1.1            | -1.2            | Il1b     | -1.0            | 1.0             |
| Ccr5   | -1.9            | -2.1            | Il1r1    | 1.5             | 1.9             |
| Ccr6   | -1.4            | -1.6            | Il1r2    | 1.2             | 1.3             |
| Ccr7   | 1.2             | -1.0            | Il1rn    | -1.7            | 1.0             |
| Ccr8   | 1.0             | -1.4            | Il27ra   | -1.5            | -2.2            |
| Ccr9   | -2.6            | -1.9            | Il6      | -1.5            | 3.3             |
| Ccr12  | -1.2            | -1.2            | Ins1     | 1.1             | 1.9             |
| Cd3e   | -1.3            | -2.7            | Ins2     | 1.3             | 2.1             |
| Cd4    | -1.4            | -2.2            | Itgax    | -1.5            | -1.4            |
| Cd40   | -1.9            | -1.7            | Itgb2    | -1.7            | -2.6            |
| Cd40lg | -1.0            | <b>-3.1</b>     | Klrd1    | -2.0            | <b>-4.5</b>     |
| Cd68   | -1.3            | -1.7            | Lta      | -1.2            | -2.6            |
| Cd80   | -1.4            | 1.4             | Ltb      | -1.5            | -2.8            |
| Cd86   | -1.5            | -1.2            | Ly6c1    | -1.2            | -1.5            |
| Cd8a   | -2.6            | <b>-5.3</b>     | Madcam1  | 1.0             | -1.4            |
| Csflr  | -1.5            | -1.5            | Ppbp     | -1.2            | 1.6             |
| Cx3cl1 | 1.0             | 1.6             | Ptprc    | -1.8            | -2.0            |
| Cx3cr1 | -1.3            | -2.0            | Reg3a    | -1.6            | -2.1            |
| Cxcl1  | 1.5             | 1.9             | Reg3b    | -2.2            | <b>-3.8</b>     |
| Cxcl10 | -1.9            | 1.0             | Reg3g    | -1.7            | -1.5            |
| Cxcl11 | -1.6            | 1.0             | Tnf      | -1.0            | 1.3             |
| Cxcl12 | -1.1            | 1.2             | Tnfrsf4  | -1.3            | -2.1            |
| Cxcl13 | -2.4            | -2.9            | Tnfsf4   | -2.1            | 1.1             |
| Cxcl16 | -1.7            | -1.8            | Vcam1    | -1.7            | -1.4            |
| Cxcl2  | -1.1            | -1.0            | Xcl1     | -1.9            | <b>-3.7</b>     |
| Cxcl9  | -2.0            | <b>-3.7</b>     | Xcr1     | -1.6            | -1.4            |
| Cxcr3  | -1.4            | <b>-4.4</b>     |          |                 |                 |
| Cxcr4  | -1.2            | -2.1            |          |                 |                 |

Genes downregulated by Tregs > 3-fold in **bold**.

Genes upregulated by Tregs > 3-fold in *italics*.
