# Supplementary material
Source: PubMed Central journal article supplement (PMC4369402)
Supplement: NIHMS661935-supplement-2.pdf [file NIHMS661935-supplement-2.pdf]

## Video Legends

**Supplemental Video 1.** Tregs engage islet DCs in dynamic interactions.  $3 \times 10^6$  CMTMR-labeled BDC2.5 Tregs were i.v. injected into a NOD.CD11c-YFP.CD28<sup>-/-</sup> mouse. Islets were isolated 18 h later for imaging by two-photon microscopy. Maximal projection time-lapse video of a representative islet showing BDC2.5 Tregs (red) crawling over CD11c<sup>+</sup> DCs (white). Images were collected every 30 s for 20 min and are displayed at 10 frames/s. Elapsed time is displayed in min:s.

**Supplemental Video 2.** 8.3 CD8<sup>+</sup> T cells engage islet DCs.  $10^7$  CMTMR-labeled CD8<sup>+</sup> T cells isolated from the spleens of TCR transgenic NOD.8.3 mice were transferred to NOD.CD11c-YFP.CD28<sup>-/-</sup> mice. Islets were harvested the following day and imaged by two-photon microscopy. Maximal projection time-lapse video from a representative islet depicting CD11c<sup>+</sup> DCs (white) interacting with 8.3 CD8<sup>+</sup> T cells (red). Images were collected every 30 s for 20 min and are displayed at 10 frames/s. Elapsed time is displayed in min:s. See also Figure 3.

**Supplemental Video 3.** BDC2.5 Tregs do not disrupt interactions of islet 8.3 CD8<sup>+</sup> T cells with DCs.  $10^7$  CMTMR-labeled CD8<sup>+</sup> T cells isolated from the spleens of TCR transgenic NOD.8.3 mice were transferred to NOD.CD11c-YFP.CD28<sup>-/-</sup> mice at 7 d post-uGFP.BDC2.5 Treg treatment. Islets were harvested the following day and imaged by two-photon microscopy. Maximal projection time-lapse video from a representative islet depicting dynamic interactions of CD11c<sup>+</sup> DCs (white), 8.3 CD8<sup>+</sup> T cells (red), and BDC2.5 Tregs (green). Images were collected every 30 s for 20 min and are displayed at 10 frames/s. Elapsed time is displayed in min:s. See also Figure 3.
